# Supplementary material
Source: Royal Society of Chemistry journal article supplement (doi:10.1039/d6nr00711b)
Supplement: d6nr00711b1.pdf [file d6nr00711b1.pdf]

## **Supplementary information**

### **Nanocomposite Hydrogels with Temperature-Accelerated Antioxidant Activity for Ocular Applications**

Hyeonah Lee<sup>a</sup>, Serim Byun<sup>a</sup>, and Hyeran Noh<sup>\*a,b</sup>

a Department of Optometry, Seoul National University of Science and Technology, 232 Gongneung-ro, Nowon-gu, Seoul 01811, Korea

b SeoulTech-KIRAMS Graduate School of Biomedical Science and Engineering, Seoul National University of Science and Technology, Seoul 01811, South Korea

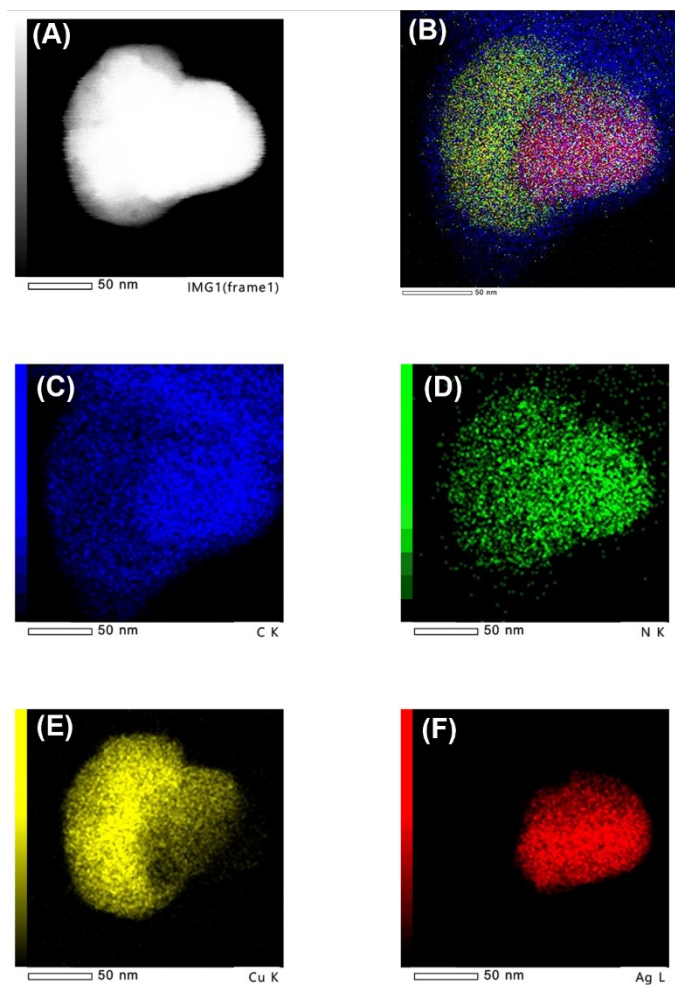

**Fig. S1** HAADF-STEM image and corresponding EDS elemental mapping of the pNIPAM–Ag/Cu@Cu nanocomposite. (A, B) HAADF-STEM images. (C) C K map and (D) N K map, both originating from the pNIPAM polymer matrix. (E) Cu K map showing Cu distribution across the entire nanoparticle volume. (F) Ag L map showing Ag confined to the central core region, confirming preservation of the Ag core / Cu shell architecture within the pNIPAM matrix. Scale bars, 50 nm.

(A) Contact Lens Composition(NIPAM:Nanocomposite, v/v%)

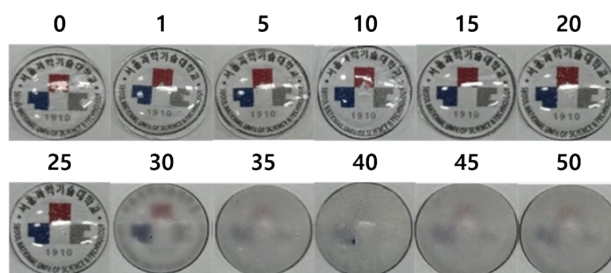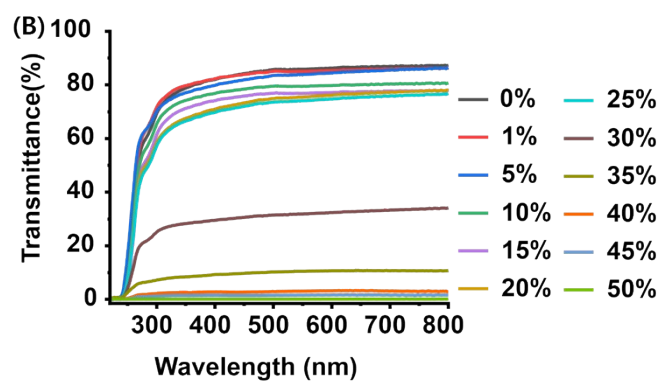

**Fig. S2** Optical properties of nanocomposite contact lenses as a function of nanoparticle concentration. (A) Digital photographs showing the visual clarity of lenses formulated with varying concentrations (v/v%) of the nanocomposite, (B) UV-Vis transmittance spectra of the lenses.

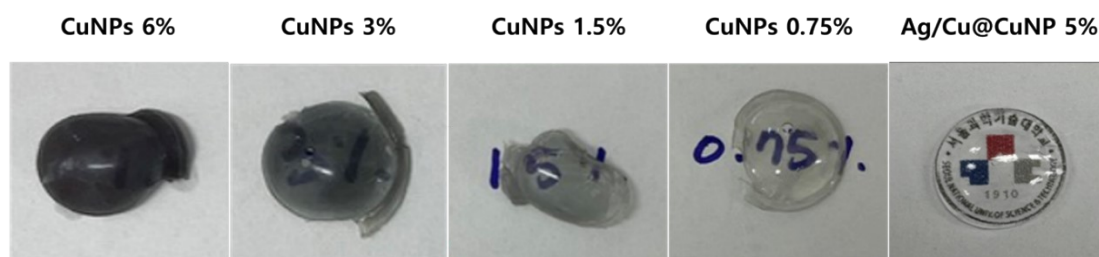

**Fig. S3** Photographic images of hydrogel contact lenses containing only Ag/Cu@Cu bimetallic nanoparticles at various loadings (0.75%, 1.5%, 3%, and 6% v/v). Transparency decreased progressively with increasing nanoparticle content, with the highest loading (6%) exhibiting pronounced whiteness and opacity. These findings highlight that, in the absence of pNIPAM encapsulation, Ag/Cu@Cu nanoparticles induce strong light scattering and substantially compromise lens optical performance.

**Table S1.** Comparative summary of representative antioxidant strategies for ocular applications.

| System                                               | Transmittance                                             | Stability                                                            | Temp. Response                                  | Mechanism                                                | Ref.             |
|------------------------------------------------------|-----------------------------------------------------------|----------------------------------------------------------------------|-------------------------------------------------|----------------------------------------------------------|------------------|
| Conventional antioxidant-incorporated ocular systems | Decreases with agent release; transparency loss over time | Poor; continuous passive release depletes agent; low bioavailability | None (passive diffusion)                        | Non-enzymatic, consumable (e.g., Vit. C/E)               | [10, 11, 18]     |
| Enzyme-mimetic nanoparticle (nanozyme) systems       | Compromised at high NP loadings due to scattering         | Moderate; NP aggregation without stabilizing matrix                  | None                                            | Enzymatic SOD/CAT-mimetic                                | [28, 30, 33]     |
| Unencapsulated NP-loaded hydrogels                   | Reduced at high loadings due to aggregation               | Poor; oxidation-driven degradation within hours                      | None                                            | Surface redox (non-enzymatic)                            | [19, 20, 36]     |
| <b>pNIPAM–Ag/Cu@Cu (This work)</b>                   | <b>&gt;70% at ≤25% v/v loading; visually clear</b>        | <b>High; &gt;24 h sustained activity; pNIPAM encapsulation</b>       | <b>Yes; LCST-mediated (k doubles, 25→35 °C)</b> | <b>Dual: SOD-mimetic + non-enzymatic (Ag/Cu synergy)</b> | <b>This work</b> |

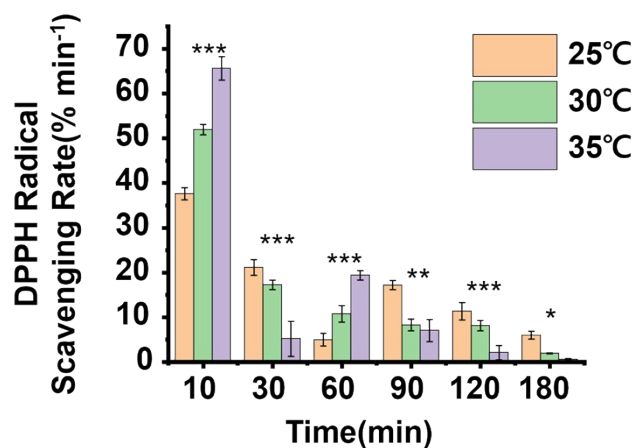

**Fig. S4** Thermoresponsive antioxidant activity of the nanocomposite contact lenses (20% v/v).; Instantaneous scavenging rates (%/min) calculated over discrete time intervals. Asterisks indicate statistical significance between temperature groups at each time interval, as determined by post-hoc tests (\* $p < 0.05$ , \*\* $p < 0.01$ , \*\*\* $p < 0.001$ ). Data are presented as mean  $\pm$  SD (n = 5 per group).

**Table S2.** Linear regression statistics for pseudo-first-order kinetic fits of DPPH radical scavenging at each temperature.

| Temperature (°C) | Temperature (K) | Rate constant k (%/min) | ln(k)         | R <sup>2</sup> | n        |
|------------------|-----------------|-------------------------|---------------|----------------|----------|
| 25               | 298.15          | 0.37                    | -0.994        | 0.949          | 5        |
| 30               | 303.15          | 0.58                    | -0.545        | 0.959          | 5        |
| <b>35</b>        | <b>308.15</b>   | <b>0.74</b>             | <b>-0.301</b> | <b>0.962</b>   | <b>5</b> |

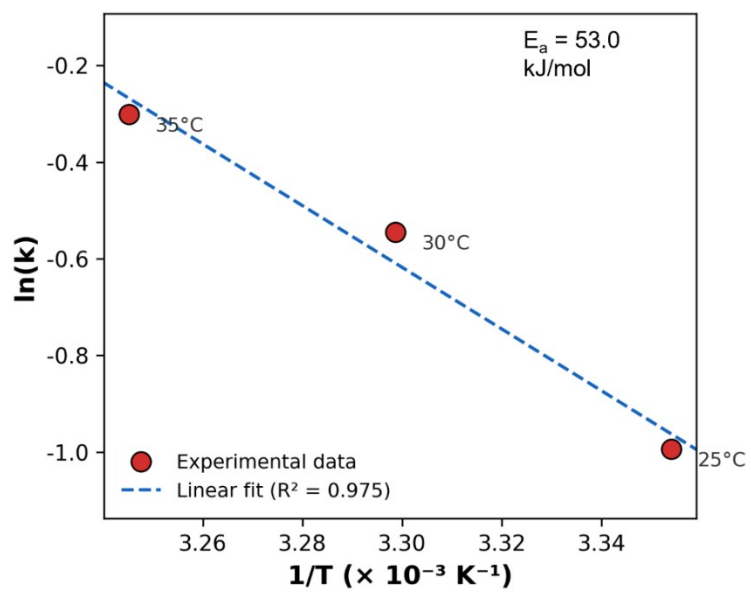

**Fig. S5** Arrhenius plot of the temperature-dependent rate constants for DPPH radical scavenging by pNIPAM–Ag/Cu@Cu nanocomposite contact lenses (20% v/v).

**Table S3.** Two-way ANOVA results for DPPH radical scavenging by nanocomposite contact lenses.

| <b>Source of Variation</b>              | <b>df</b> | <b>p-value</b> | <b>Significance</b> |
|-----------------------------------------|-----------|----------------|---------------------|
| Time (main effect)                      | 5         | $p < 0.0001$   | ***                 |
| Temperature (main effect)               | 2         | $p = 0.583$    | n.s.                |
| Temperature $\times$ Time (interaction) | 10        | $p < 0.0001$   | ***                 |
| Residual (within-group)                 | 72        | —              | —                   |
